# Supplementary material for: Multisource Synergistic Electrocatalytic Oxidation Effect of Strongly Coupled PdM (M = Sn, Pb)/N-doped Graphene Nanocomposite on Small Organic Molecules
Source: PubMed Central journal article supplement (PMC4593028; doi:10.1038/srep14173), 2015-10-05
Supplement: srep14173-s1.pdf [file srep14173-s1.pdf]

**Multisource Synergistic Electrocatalytic Oxidation Effect of Strongly  
Coupled PdM (M=Sn, Pb) /N-doped Graphene Nanocomposite on  
Small Organic Molecules**

Peng Wu<sup>a</sup>, Yiyin Huang<sup>a</sup>, Longtian Kang<sup>a</sup>, Maoxiang Wu<sup>a</sup>, Yaobing Wang<sup>a,\*</sup>

<sup>a</sup> State Key Laboratory of Structural Chemistry; Key Laboratory of design and assembly of functional nanostructures, Fujian Institute of Research on the Structure of Matter, Chinese Academy of Sciences, YangQiao West Road 155#, Fuzhou, 350002, P. R. China. E-mail: [wangyb@fjirsm.ac.cn](mailto:wangyb@fjirsm.ac.cn)

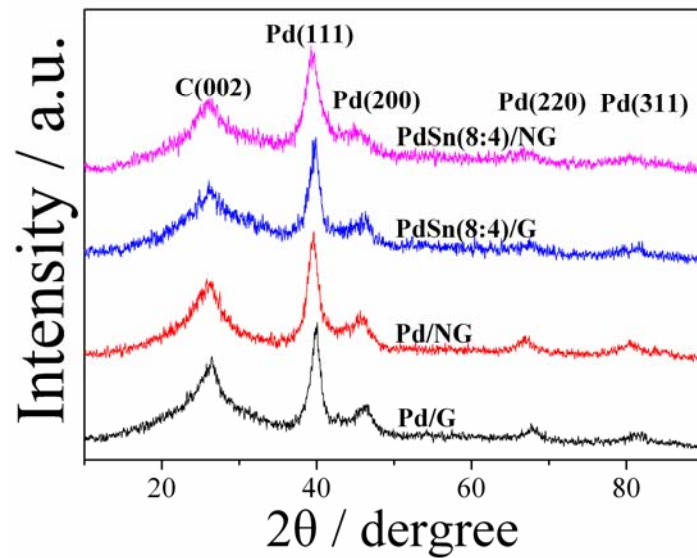

**Figure S1.** XRD patterns of Pd/G, Pd/NG, PdSn(8:4)/NG and PdSn(8:4)/G.

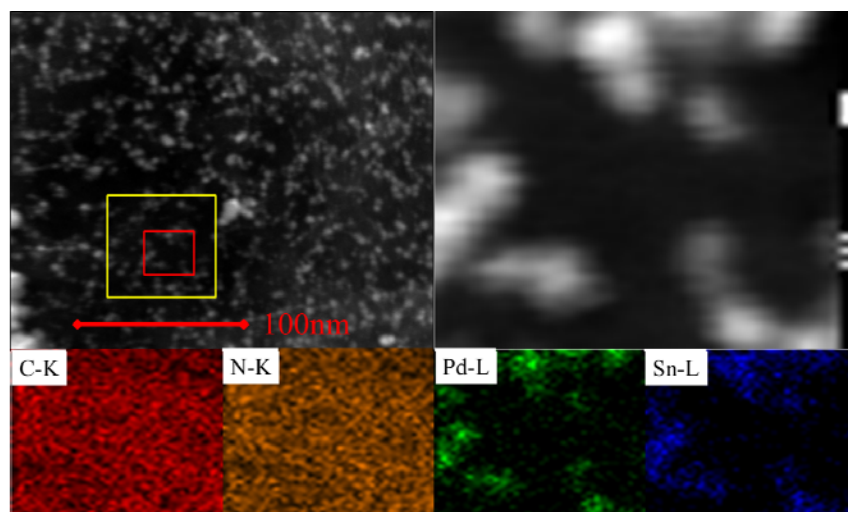

**Figure S2.** EELS mappings of the PdSn/NG sample showing the distributions of C, N, Pd and Sn.

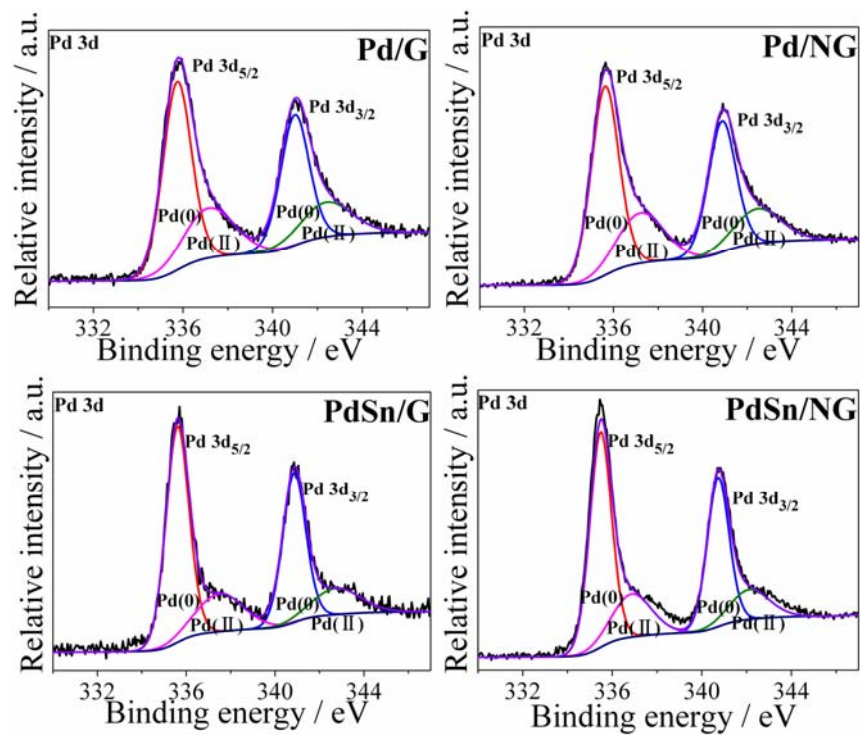

**Figure S3.** XPS spectrum of Pd/G, Pd/NG, PdSn/G and PdSn/NG in Pd 3d region.

**Table S1.** The ratios between bivalent species and metallic Pd.

| <i>BEs/eV</i>  | <i>Pd3d<sub>5/2</sub></i><br><i>[Pd(II):Pd(0)]</i><br><i>ratio</i> | <i>Pd3d<sub>3/2</sub></i><br><i>[Pd(II):Pd(0)]</i><br><i>ratio</i> |
|----------------|--------------------------------------------------------------------|--------------------------------------------------------------------|
| <i>Pd/G</i>    | <b>0.54:1</b>                                                      | <b>0.54:1</b>                                                      |
| <i>Pd/NG</i>   | <b>0.49:1</b>                                                      | <b>0.50:1</b>                                                      |
| <i>PdSn/G</i>  | <b>0.40:1</b>                                                      | <b>0.43:1</b>                                                      |
| <i>PdSn/NG</i> | <b>0.40:1</b>                                                      | <b>0.41:1</b>                                                      |

**Table S2.** The peak of XPS spectrum in Pd 3d region

| <i>BEs/eV</i>  | <i>Pd3d<sub>5/2</sub></i> | <i>Pd3d<sub>3/2</sub></i> |
|----------------|---------------------------|---------------------------|
| <i>Pd/G</i>    | <b>335.8</b>              | <b>341.0</b>              |
| <i>Pd/NG</i>   | <b>335.7</b>              | <b>340.9</b>              |
| <i>PdSn/G</i>  | <b>335.7</b>              | <b>340.8</b>              |
| <i>PdSn/NG</i> | <b>335.5</b>              | <b>340.7</b>              |

**Table S3.** The peak of XPS spectrum in Sn 3d region

| <i>BEs/eV</i>  | <i>Sn3d<sub>5/2</sub></i> | <i>Sn3d<sub>3/2</sub></i> |
|----------------|---------------------------|---------------------------|
| <i>PdSn/G</i>  | <b>486.6</b>              | <b>495.1</b>              |
| <i>PdSn/NG</i> | <b>487.0</b>              | <b>495.4</b>              |

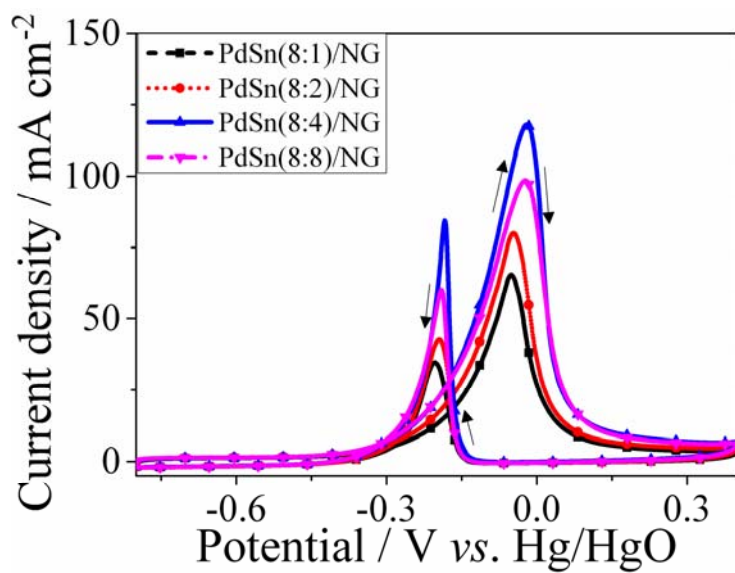

**Figure S4.** Cyclic voltammograms of PdSn/NG with different Pd/Sn atomic ratios catalysts in the 1 M KOH + 0.5 M (CH<sub>2</sub>OH)<sub>2</sub> solution. Scan rate: 50 mV s<sup>-1</sup>.

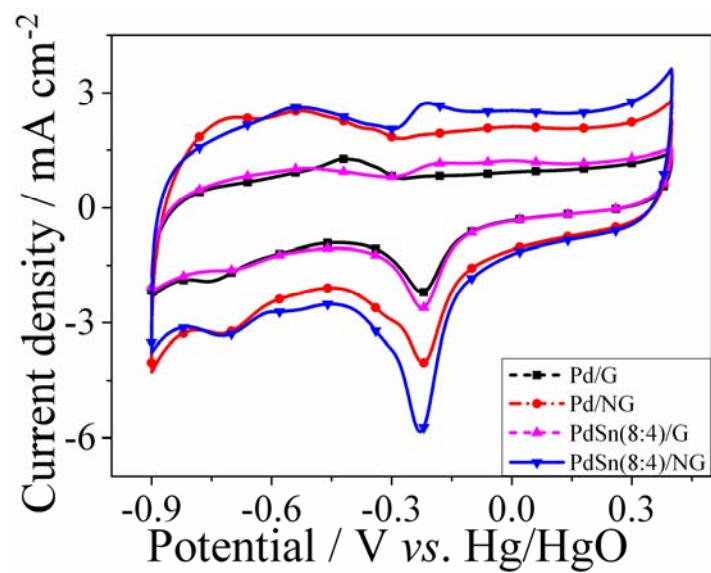

**Figure S5.** Cyclic voltammograms of Pd/G, Pd/NG, PdSn(2:1)/G and PdSn(2:1)/NG in the 1 M KOH solution. Scan rate: 50 mV s<sup>-1</sup>.

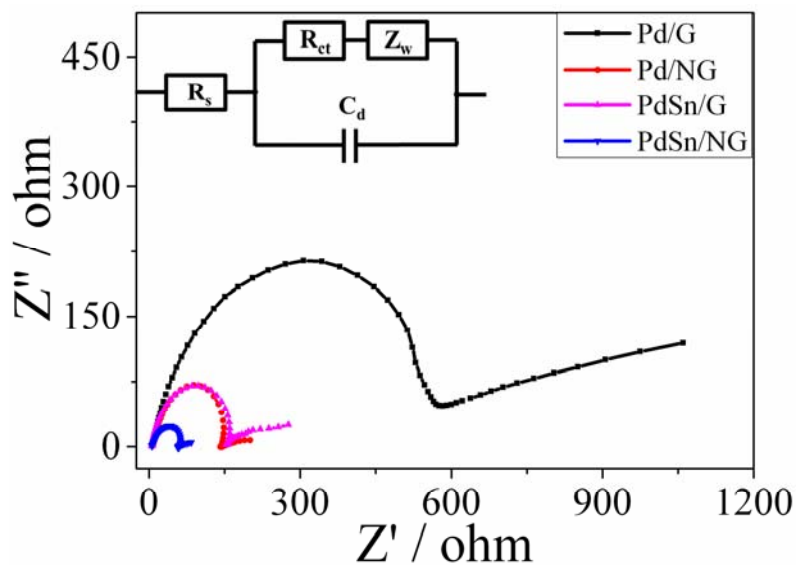

**Figure S6.** Electrochemical impedance spectra in 1 M KOH + 0.5 M  $(\text{CH}_2\text{OH})_2$  solution at  $-0.15$  V. The amplitude of the modulation potential is 5 mV. The frequency ranged from 100 kHz to 100 mHz and the equivalent circuit used to fit the impedance spectra.



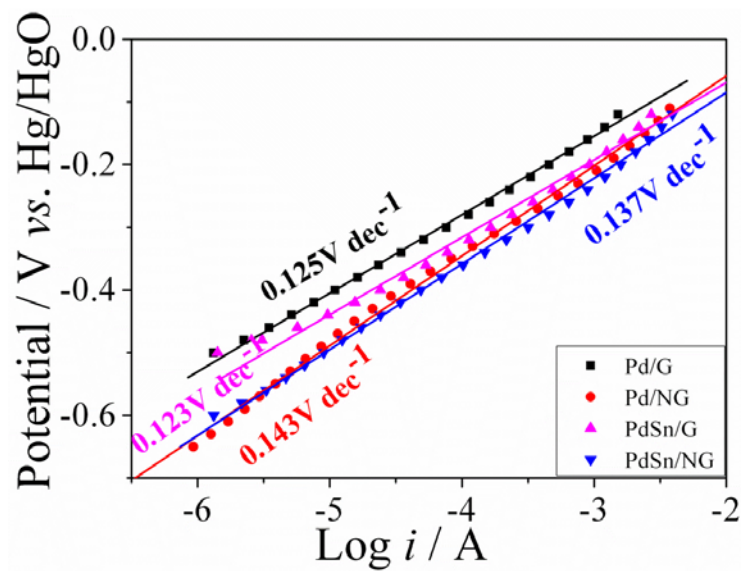

**Figure S7.** Tafel plots of the as-prepared catalysts were performed at the scan rate of  $2 \text{ mV s}^{-1}$  in  $1 \text{ M KOH} + 0.5 \text{ M (CH}_2\text{OH)}_2$  solution.

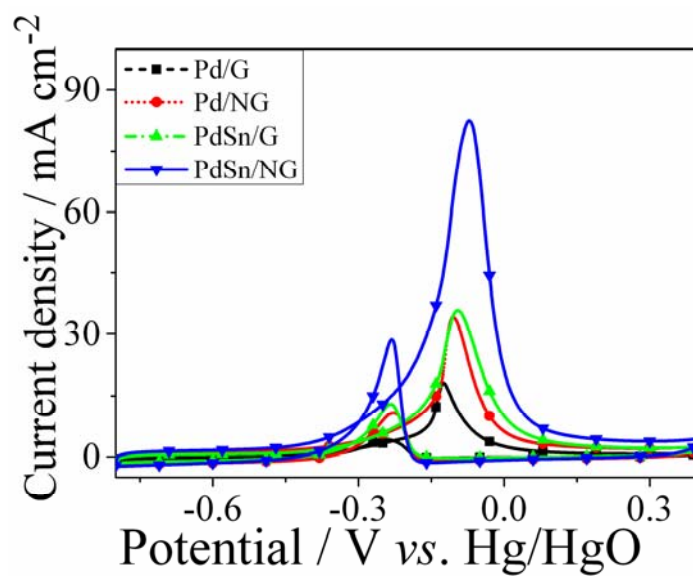

**Figure S8.** Cyclic voltammograms of Pd/G, Pd/NG, PdSn/G and PdSn/NG in the 1 M KOH + 0.5 M CH<sub>3</sub>OH solution. Scan rate: 50 mV s<sup>-1</sup>.

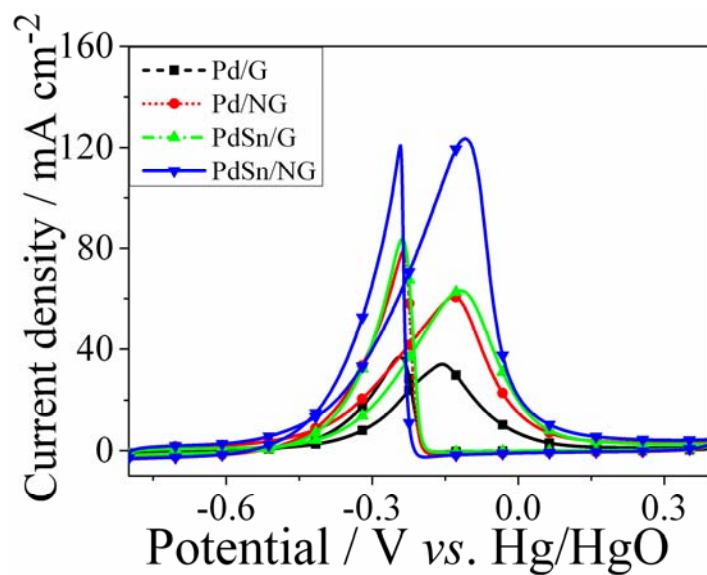

**Figure S9.** Cyclic voltammograms of Pd/G, Pd/NG, PdSn/G and PdSn/NG in the 1 M KOH + 0.5 M C<sub>2</sub>H<sub>5</sub>OH solution. Scan rate: 50 mV s<sup>-1</sup>.

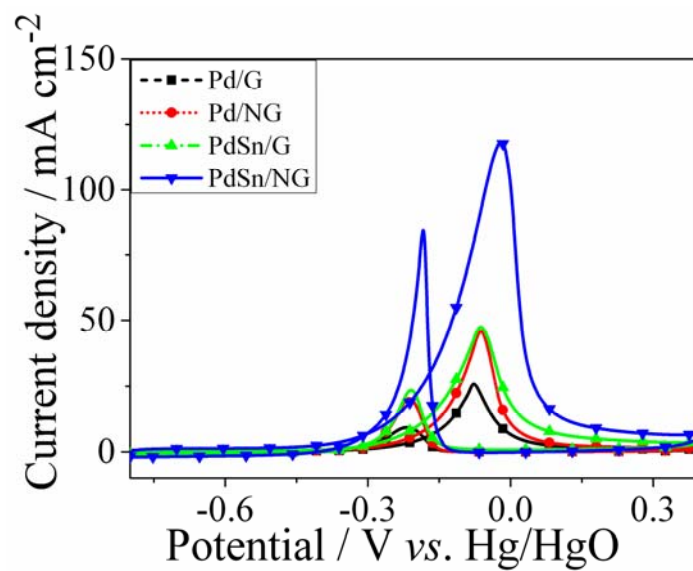

**Figure S10.** Cyclic voltammograms of Pd/G, Pd/NG, PdSn/G and PdSn/NG in the 1 M KOH + 0.5 M (CH<sub>2</sub>OH)<sub>2</sub> solution. Scan rate: 50 mV s<sup>-1</sup>.

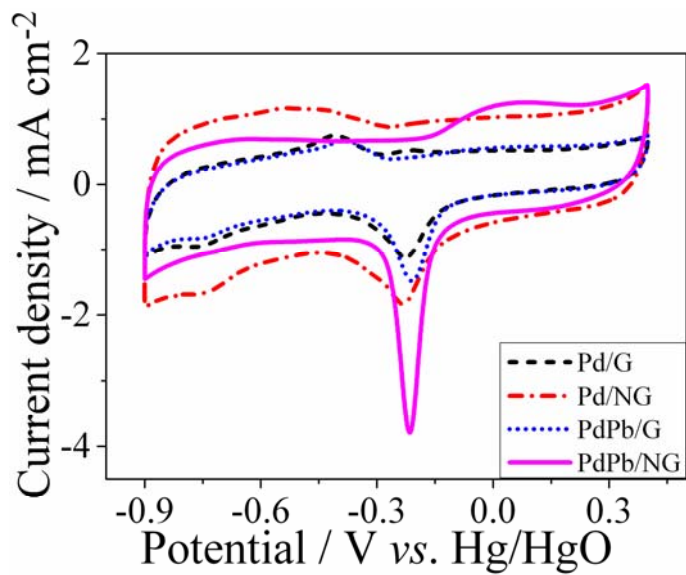

**Figure S11.** Cyclic voltammograms of Pd/G, Pd/NG, PdPb(2:1)/G and PdPb(2:1)/NG in the 1 M KOH solution. Scan rate: 50 mV s<sup>-1</sup>.

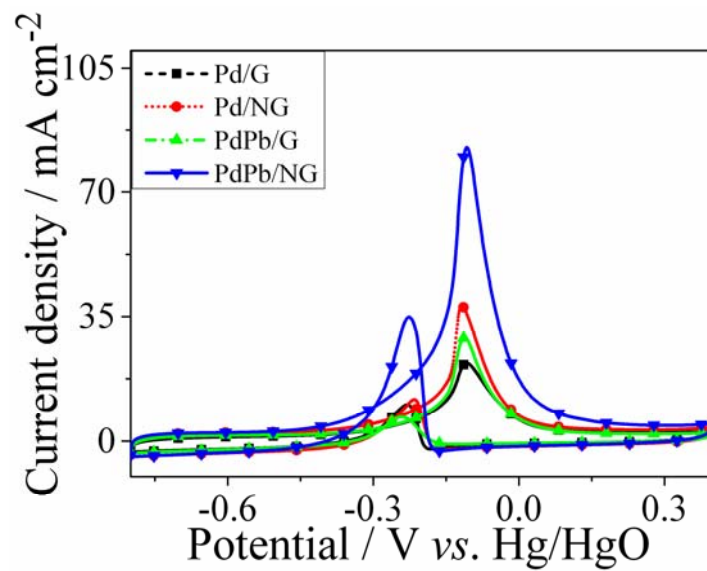

**Figure S12.** Cyclic voltammograms of Pd/G, Pd/NG, PdPb/G and PdPb/NG in the 1 M KOH + 0.5 M CH<sub>3</sub>OH solution. Scan rate: 50 mV s<sup>-1</sup>.

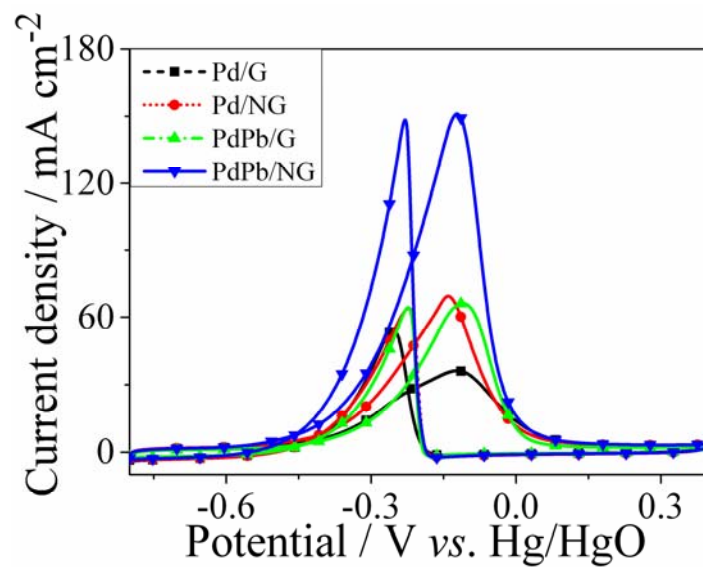

**Figure S13.** Cyclic voltammograms of Pd/G, Pd/NG, PdPb/G and PdPb/NG in the 1 M KOH + 0.5 M C<sub>2</sub>H<sub>5</sub>OH solution. Scan rate: 50 mV s<sup>-1</sup>.

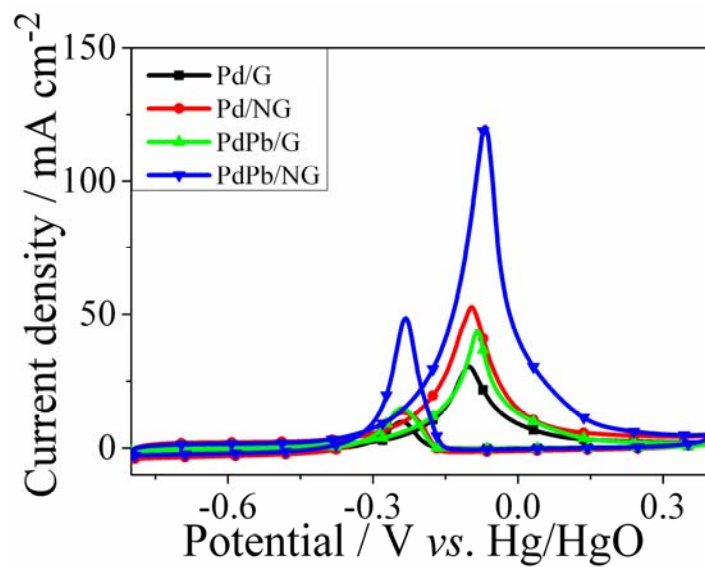

**Figure S14.** Cyclic voltammograms of Pd/G, Pd/NG, PdPb/G and PdPb/NG in the 1 M KOH + 0.5 M (CH<sub>2</sub>OH)<sub>2</sub> solution. Scan rate: 50 mV s<sup>-1</sup>.
